# Supplementary material
Source: publisher figshare collection journal article supplement (https://sage.figshare.com/ndownloader/files/18613877)
Supplement: Supplementary file 1 [file 18613877]

## Online Supplemental Material

### Video-Based Interventions for Cancer Control: A Systematic Review

**Supplemental Table 1. Video Interventions by Mode of Delivery (N=315)**

| Platform Type               | Frequency  | Percent    |
|-----------------------------|------------|------------|
| Not Specified               | 184        | 58.4       |
| DVD                         | 41         | 13         |
| VHS                         | 36         | 11.4       |
| CD Rom                      | 16         | 5.1        |
| Internet/Web                | 15         | 4.8        |
| PC/Computer                 | 8          | 2.5        |
| TV                          | 3          | 1          |
| Smartphone                  | 2          | 0.6        |
| Live video                  | 1          | 0.3        |
| Tablet                      | 1          | 0.3        |
| More than one platform type | 8          | 2.5        |
| <b>Total</b>                | <b>315</b> | <b>100</b> |

**Supplemental Figure 1. Study Designs Utilized (N=315)**

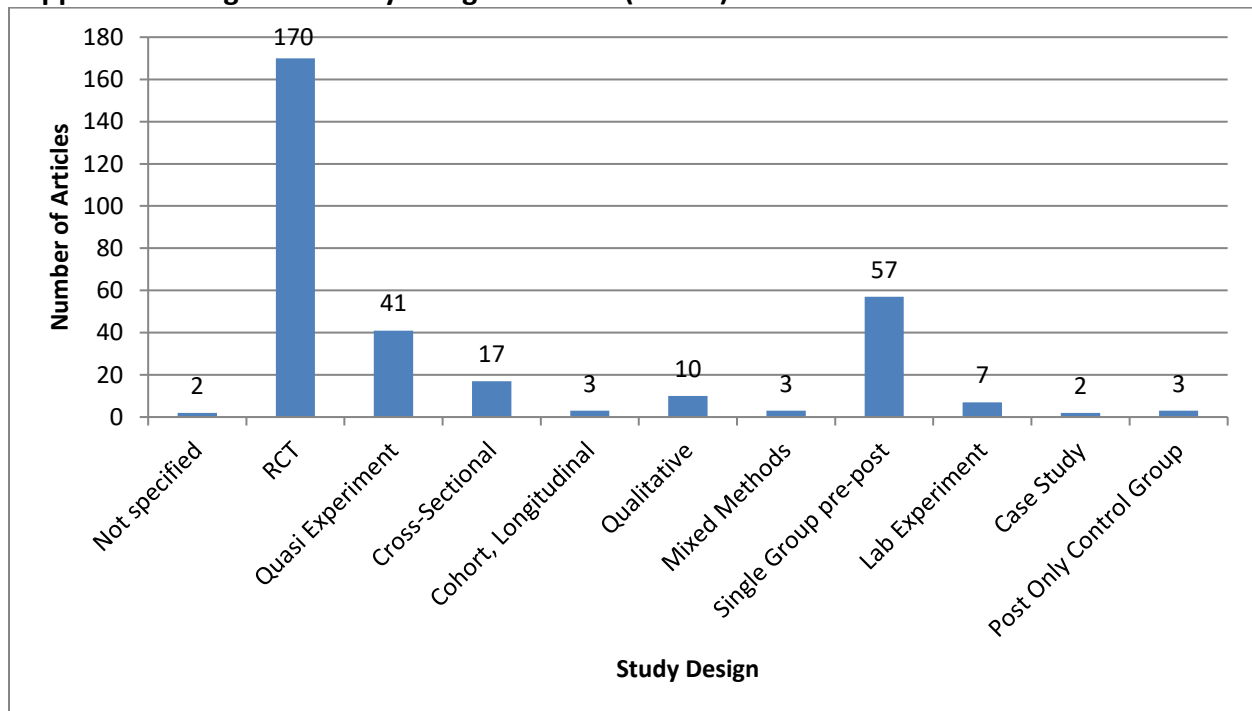

**Supplemental Figure 2. Video Interventions by Setting (N=315)**

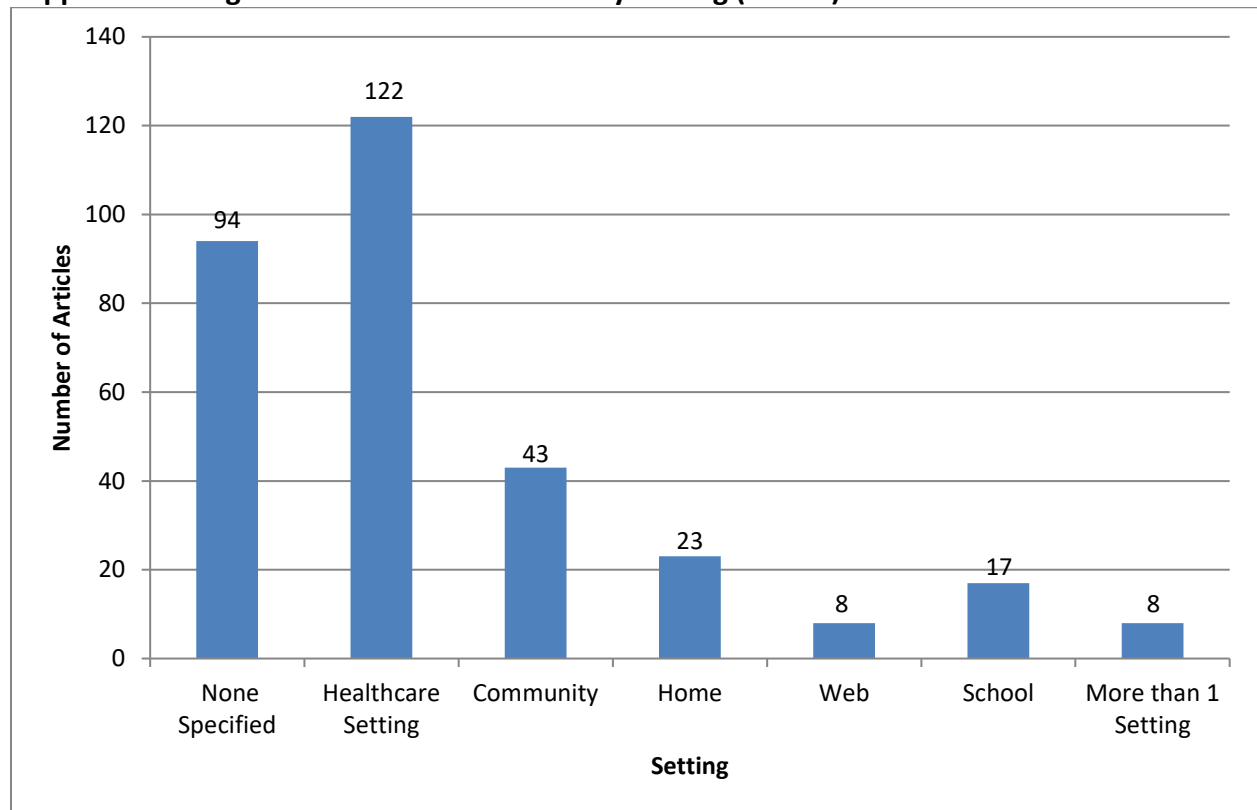

## Supplemental Appendix

Initial keyword searches were conducted in PubMed, PsycINFO, CINAHL (Cumulative Index in Nursing and Allied Health Literature), SCOPUS, and Web of Science. Results were limited to English language and to articles published from 1984 through 2014. The initial searches employed an iterative process wherein terms were searched to assess the number of relevant and irrelevant articles that would be returned. For example, “mhealth” and “web” were part of the initial search strategy but returned too many irrelevant articles to be included in the final search. (Importantly, these terms were not excluded.) The terms used in the final searches were chosen from those appearing in the table below. Cancer terms AND video terms were always used and were combined with terms from one or more of the other columns. Terms within each column were combined with OR, and terms between columns were combined with AND, except for the excluded terms which were combined with NOT or AND NOT. This search strategy returned 1,521 references, of which 779 were unique and were then reviewed further for inclusion and exclusion criteria.

| Cancer Terms                         | DVD/Video Terms           | Health Behavior/Health Communication Terms | Excluded Terms           | Other Terms         |
|--------------------------------------|---------------------------|--------------------------------------------|--------------------------|---------------------|
|                                      |                           |                                            |                          |                     |
| Neoplasm*                            | Video*                    | “Health education”                         | Letter[publication type] | “Decision aid*”     |
| Neoplasms[mh]                        | Videorecording[sh]        | Health education[mh]                       | Game*                    | “Decision support*” |
| Neoplasms/prevention and control[mh] | Videotape instruction[sh] | “Client education”                         | Advertisement*           | “Decision making”   |
| Cancer*                              | VHS                       | “Patient education”                        | Announcement*            | Intervention*       |
| Cancer screening[sh]                 | DVD*                      | “Health promotion”                         | “Video recorded”         | Impact*             |
| Cancer screening education[sh]       | CD-Rom*                   | Health promotion[mh]                       | “Video assisted”         | Effect/s            |
|                                      | “Social media”            | “Health attitude*”                         | “Video coded”/           | Effective*          |

|  |                          |                          |                               |          |
|--|--------------------------|--------------------------|-------------------------------|----------|
|  |                          |                          | "Video coding"                |          |
|  | Social media[mh]         | Attitude to health[mh]   | "Video clip*"                 | Efficacy |
|  | Social media[sh]         | Attitude*                | "Video excerpt*"              | Assess*  |
|  | YouTube                  | Knowledge                | Chronograph*                  | Evaluat* |
|  | "Visual narrative*"      | "Health knowledge"       | Colonography                  |          |
|  | Audiovisual/audio visual | Aware*                   | Colposcopy                    |          |
|  |                          | "Health behavior*"       | Laparoscop*                   |          |
|  |                          | Health behavior[mh]      | Videofluoroscop*              |          |
|  |                          | Health communication[mh] | "Audio taped interview"       |          |
|  |                          |                          | "Web conference*"             |          |
|  |                          |                          | "Clinical trial* enrollment"  |          |
|  |                          |                          | "Clinical trial* recruitment" |          |
|  |                          |                          | Telemedicine                  |          |

[mh] indicates a Medical Subject Heading in PubMed

[sh] indicates a Subject Heading in any database other than PubMed

\* indicates truncation (ie., that alternate endings were searched)
